# Supplementary material
Source: PubMed Central journal article supplement (PMC3218261)
Supplement: NIHMS324752-supplement-1.pdf [file NIHMS324752-supplement-1.pdf]

## SUPPLEMENTAL MATERIAL

**Supplemental Table 1.** Primer Sequence for Real-Time PCR

| <b>Gene Name</b>                | <b>Forward</b>            | <b>Reverse</b>             |
|---------------------------------|---------------------------|----------------------------|
| <b>PGC-1<math>\alpha</math></b> | TGACACAACACGGACAGAAC      | GCATCACAGGTATAACGGTAGG     |
| <b>PGC-1<math>\beta</math></b>  | AACTTCTGGCTCAAGACGTGCTCT  | TCTTGGGTGAAGCTGCGATCCTTA   |
| <b>NRF1</b>                     | GGCACTGTCTCACTTATCCAGGTT  | CAGCCACGGCAGAATAATTCA      |
| <b>NRF2B2</b>                   | TGAAACGGGTGTATCTGCTG      | GAACAACTACTTGCTGAATGGC     |
| <b>NFR2A</b>                    | AGAAGCTCACCTGGGAACAGAACA  | CTGTGCAACCAGTTCAGGCTGATT   |
| <b>TFAM</b>                     | AATGGATAGGCACAGGAAACC     | CAAGTATTATGCTGGCAGAAGTC    |
| <b>TFB1M</b>                    | GGACACTCGATTTATTCCTGGATT  | ACATCTCCATGAACAATTCTCAGTTT |
| <b>TFB2M</b>                    | TCTGGCAATTAGCTTGTGAGATTAA | CCTACGCTTTGGGTTTTCCA       |
| <b>POLG</b>                     | TGTCAACCAGAACTGGGAGCGTTA  | TGGCCAGATCCATCAACGACTTCT   |
| <b>TOP1MT</b>                   | TTATCCTACAACCGAGCCAACCGA  | TCTTTGCCTGGATCTTCGTCTGGA   |
| <b>SSBP1</b>                    | TGCTCGGGTTAGATCGTCAGGAAA  | GCCCAAGTAAGTGACACACGATTCA  |
| <b>TWINKLE</b>                  | ATTGTAGAAGGACGTGGACGCGAA  | TGCAGAGCTCACTCTAGGTGCATT   |
| <b>16S rRNA</b>                 | CGCATAAGCCTGCGTCAGATCAAA  | TGTGTTGGGTTGACAGTGAGGGTA   |
| <b>ND6</b>                      | ATAGGATCCTCCCGAATCAACCCT  | AGGATTGGTGCTGTGGGTGAAAGA   |
| <b>COI</b>                      | ACCCTAGACCAAACCTACGCCAAA  | TAGGCCGAGAAAGTGTGTGGGAA    |
| <b>CYTB</b>                     | AGTCCCACCCTCACACGATTCTTT  | AGTAAGCCGAGGGCGTCTTTGATT   |
| <b>18S rRNA</b>                 | GTAACCCGTTGAACCCATT       | CCATCCAATCGGTAGTAGCG       |

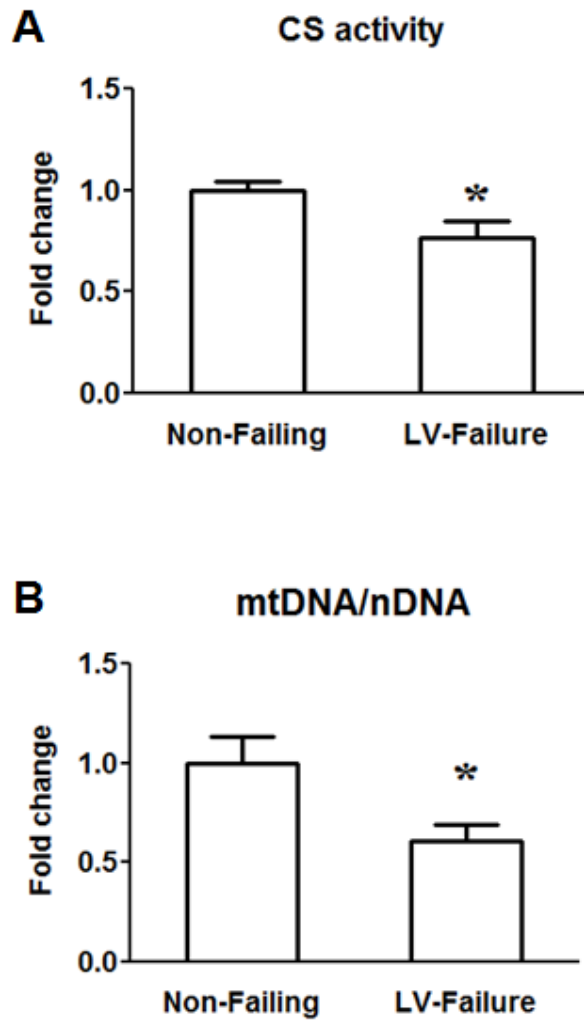

**Supplemental Figure 1.** Assessment of mitochondrial mass and mtDNA content in the LV. (A) Citrate Synthase activity and (B) mtDNA content normalized to nDNA in LV failure (n=8) compared to the Non-Failing LV controls (n=5). Data are given as the mean of the fold changes  $\pm$  SEM relative to the Non-Failing RV (\*  $p \leq 0.05$  vs. Non-Failing).

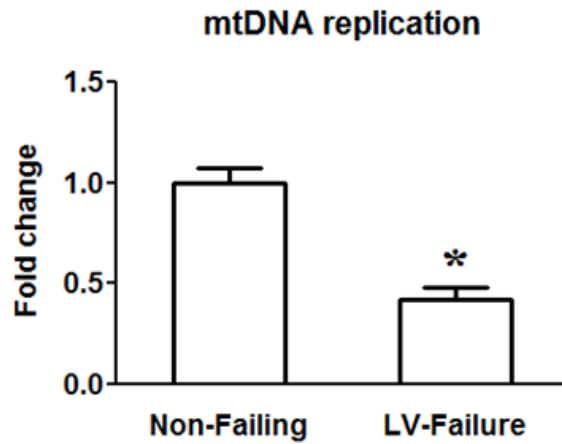

**Supplemental Figure 2.** Impaired mtDNA replication in LV failure. MtDNA replication was assessed by measuring the extension of 7S DNA beyond the D-Loop and normalized to mtDNA in LV failure (n=8) compared to the Non-Failing LV controls (n=5). Data are given as the mean of the fold changes  $\pm$  SEM relative to the Non-Failing RV (\*  $p \leq 0.05$  vs. Non-Failing).

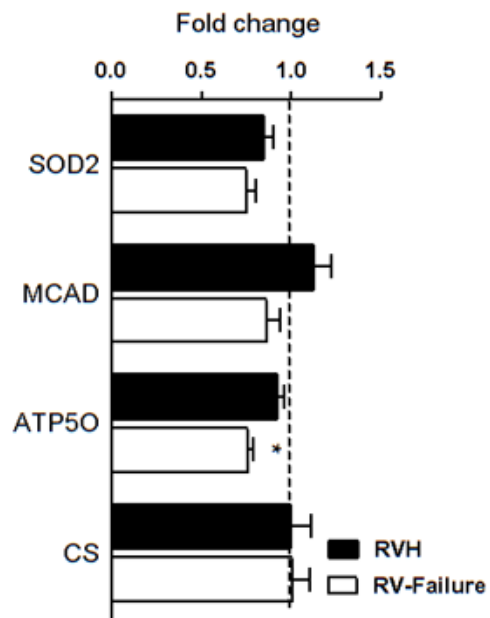

**Supplemental Figure 3.** mRNA expression of nDNA encoded mitochondrial proteins. Mean of the fold changes  $\pm$  SEM in gene expressions for nDNA genes encoding mitochondrial proteins in the RVH (n=25) and RV-failure (n=6) relative to Non-Failing controls (indicated by the dashed line; n=5; \*  $p \leq 0.05$  vs. Non-Failing).
